# Supplementary material for: Characterization of humoral and SARS-CoV-2 specific T cell responses in people living with HIV
Source: PubMed Central journal article supplement (PMC7987102; doi:10.21203/rs.3.rs-309746/v1), 2021-03-17

**Supplementary Table 1. Cohort Demographics and Clinical Characteristics**

|                                |                                                    | HIV+,<br>Lab confirmed<br>SARS-CoV-2<br>RT-PCR+ and/or<br>Ab Pos | HIV+<br>*Suspected<br>SARS-CoV-2                    | HIV-<br>Lab confirmed<br>SARS-CoV-2<br>RT-PCR+ and/or<br>Ab Pos | HIV-<br>*Suspected/<br>Household | HIV+<br>pre-<br>pandemic |
|--------------------------------|----------------------------------------------------|------------------------------------------------------------------|-----------------------------------------------------|-----------------------------------------------------------------|----------------------------------|--------------------------|
| <b>Group size</b>              | n                                                  | 24                                                               | 23                                                  | 31                                                              | 4                                | 16                       |
|                                | SARS-CoV-2 seropositive at date of sampling, n (%) | 23 (95.8)                                                        | 7 (30.43)                                           | 29 (93.5)                                                       | 0 (0.0)                          | 0 (0.0)                  |
| <b>COVID-19 severity**</b>     | Asymptomatic (score 1), n (%)                      | 2 (8.3)                                                          | 0 (0.0)                                             | 4 (12.9)                                                        | 1 (25.0)                         | -                        |
|                                | Non-hospitalized (score 2), n (%)                  | 14 (58.3)                                                        | 22 (95.7)                                           | 23 (74.2)                                                       | 3 (75.0)                         | -                        |
|                                | Hospitalized (score 4-5), n (%)                    | 8 (33.3)                                                         | 1 (4.3)                                             | 4 (12.9)                                                        | 0 (0.0)                          | -                        |
| <b>COVID-19 symptoms</b>       | Fever, n (%)                                       | 13 (54.2)                                                        | 18 (78.3)                                           | 16 (51.6)                                                       | 2 (50.0)                         | -                        |
|                                | Shortness of breath, n (%)                         | 14 (58.3)                                                        | 14 (60.9)                                           | 12 (38.7)                                                       | 1 (25.0)                         | -                        |
|                                | Fatigue, n (%)                                     | 21 (87.5)                                                        | 20 (87.0)                                           | 20 (64.5)                                                       | 4 (100.0)                        | -                        |
|                                | Cough, n (%)                                       | 17 (70.8)                                                        | 18 (78.3)                                           | 12 (38.7)                                                       | 3 (75.0)                         | -                        |
|                                | Headache, n (%)                                    | 10 (41.7)                                                        | 14 (60.9)                                           | 13 (41.9)                                                       | 2 (50.0)                         | -                        |
|                                | Altered taste/smell, n (%)                         | 13 (54.2)                                                        | 10 (43.5)                                           | 22 (71.0)                                                       | 2 (50.0)                         | -                        |
|                                | Duration of symptoms in days, median (range)       | 14 (2-48)                                                        | 21 (3-84)                                           | 10 (3-30)                                                       | 7 (5-7)                          | -                        |
|                                | Days post-symptom onset (DPSO), median (range)     | 148 (46-232)                                                     | 181 (126-273)                                       | 144 (101-220)                                                   | 200 (125-203)                    | -                        |
| <b>Risk factors</b>            | Age, median (range)                                | 51 (30-73)                                                       | 53 (30-67)                                          | 42 (26-65)                                                      | 35.5 (30-41)                     | 48 (30-60)               |
|                                | Sex, n female:male:other                           | 4:19:1                                                           | 2:21:0                                              | 16:15:0                                                         | 2:2:0                            | 2:14:0                   |
|                                | BMI, median (range)                                | 27.3 (20.2-33.8)                                                 | 24.6 (20.3-39.4)                                    | 25.7 (19.1-37.7)                                                | 21.9 (20.0-27.6)                 |                          |
| <b>Ethnicity</b>               | White, n (%)                                       | 16 (66.7)                                                        | 17 (73.9)                                           | 19 (61.3)                                                       | 1 (25.0)                         | 11 (68.8)                |
|                                | BAME, n (%)                                        | 8 (33.3)                                                         | 6 (26.1)                                            | 12 (38.7)                                                       | 3 (75.0)                         | 5 (31.3)                 |
| <b>Smoking</b>                 | Current, n (%)                                     | 3 (12.5)                                                         | 4 (17.4)                                            | 5 (16.1)                                                        | 0 (0.0)                          | 2 (12.5)                 |
|                                | Ex-smoker, n (%)                                   | 1 (4.2)                                                          | 1 (4.3)                                             | 2 (6.5)                                                         | 0 (0.0)                          | 1 (6.3)                  |
|                                | Non-smoker, n (%)                                  | 20 (83.3)                                                        | 18 (78.3)                                           | 24 (77.4)                                                       | 4 (100.0)                        | 13 (81.3)                |
| <b>HIV parameters</b>          | HIV viral load                                     | <50                                                              | <50                                                 | -                                                               | -                                | <50                      |
|                                | CD4, median (range)                                | 571 (133-1110)                                                   | 586 (310-1360)                                      | -                                                               | -                                | 590 (350-940)            |
|                                | CD4:CD8, median (range)                            | 0.84 (0.17-2.54)                                                 | 0.97 (0.37-2.15)                                    | -                                                               | -                                | 0.82 (0.43-2.26)         |
| <b>Pre-existing conditions</b> | None, n (%)                                        | 10 (41.7)                                                        | 8 (34.8)                                            | 15 (48.4)                                                       | 4 (100.0)                        | 11 (68.8)                |
|                                | Diabetes, n (%)                                    | 6 (25.0)                                                         | 1 (4.3)                                             | 1 (3.2)                                                         | 0 (0.0)                          | 1 (6.3)                  |
|                                | Hypertension/CVD, n (%)                            | 7 (29.2)                                                         | 2 (8.7)                                             | 3 (9.7)                                                         | 0 (0.0)                          | 2 (12.5)                 |
|                                | Renal disease, n (%)                               | 2 (8.3)                                                          | 2 (8.7)                                             | 0 (0.0)                                                         | 0 (0.0)                          | 0 (0)                    |
|                                | Respiratory disease (asthma and COPD), n (%)       | 2 (8.3)                                                          | 4 (17.4)                                            | 1 (3.2)                                                         | 0 (0.0)                          | 0 (0)                    |
|                                | Liver disease, n (%)                               | 1 (4.2)                                                          | 2 (8.7)                                             | 0 (0.0)                                                         | 0 (0.0)                          | 1 (6.3)                  |
|                                | Other                                              | ITP, psoriasis, pituitary gland failure                          | Osteoporosis, peripheral neuropathy, hypothyroidism | RA, iron deficiency, psoriasis, gout, SLE, hypothyroidism       |                                  |                          |

\*Confirmed, possible and probable cases specified by the case definition for COVID-19, as of 29 May 2020, European Centre for Disease Prevention and Control [<https://www.ecdc.europa.eu/en/covid-19/surveillance/case-definition>]

\*\*Severity of COVID-19 was classified according to the WHO (World Health Organisation) clinical progression scale (Aitken et al., 2020).

## Supplementary Table 2

### Fluorochrome-Conjugated Antibodies:

| Antibodies                                                        | Supplier       | Identifier   | Clone            |
|-------------------------------------------------------------------|----------------|--------------|------------------|
| APC anti-human IgM Antibody                                       | BioLegend      | Cat # 314510 | Clone # MHM-88   |
| APC/Cyanine7 anti-human CD19 Antibody                             | BioLegend      | Cat # 363010 | Clone # SJ25C1   |
| APC/Cy7 anti-human CD197 (CCR7)                                   | BioLegend      | Cat # 353212 | Clone # G043H7   |
| Brilliant Violet 605™ anti-human CD3 Antibody                     | BioLegend      | Cat # 317322 | Clone # OKT3     |
| Brilliant Violet 650™ anti-human CD127 (IL-7R $\alpha$ ) Antibody | BioLegend      | Cat # 351325 | Clone # A019D5   |
| Brilliant Violet 650™ anti-human CD3 Antibody                     | BioLegend      | Cat # 317324 | Clone # OKT3     |
| Brilliant Violet 711™ anti-human CD27 Antibody                    | BioLegend      | Cat # 302833 | Clone # O323     |
| Brilliant Violet 785™ anti-human CD38 Antibody                    | BioLegend      | Cat # 303530 | Clone # HIT2     |
| Alexa Fluor® 700 anti-human CD45RA Antibody                       | BioLegend      | Cat # 304120 | Clone # HI100    |
| PE/Cyanine7 anti-human CD45RA Antibody                            | BioLegend      | Cat # 304126 | Clone # HI100    |
| Brilliant Violet 421™ anti-human CD279 (PD-1) Antibody            | BioLegend      | Cat # 329920 | Clone # EH12.2H7 |
| PE/Dazzle™ 594 anti-human CD4 Antibody                            | BioLegend      | Cat # 300548 | Clone # RPA-T4   |
| PE anti-human IgD Antibody                                        | BioLegend      | Cat # 348204 | Clone # IA6-2    |
| APC anti-human IFN- $\gamma$ Antibody                             | BioLegend      | Cat # 506510 | Clone # B27      |
| Brilliant Violet 785™ anti-human CD8a Antibody                    | BioLegend      | Cat # 301046 | Clone # RPA-T8   |
| Brilliant Violet 711™ anti-human CD8a Antibody                    | BioLegend      | Cat # 301044 | Clone # RPA-T8   |
| Brilliant Violet 510™ anti-human CD4 Antibody                     | BioLegend      | Cat # 300546 | Clone # RPA-T4   |
| Brilliant Violet 510™ anti-human CD14 Antibody                    | BioLegend      | Cat # 301842 | Clone # M5E2     |
| Brilliant Violet 510™ anti-human CD19 Antibody                    | BioLegend      | Cat # 302242 | Clone # HIB19    |
| Brilliant Violet 711™ anti-human CD279 (PD-1) Antibody            | BioLegend      | Cat # 329928 | Clone # EH12.2H7 |
| Brilliant Violet 711™ anti-human PD-1 Antibody                    | BioLegend      | Cat # 300232 | Clone # RPA-2.10 |
| PE/Cyanine7 anti-human CD154 Antibody                             | BioLegend      | Cat # 310832 | Clone # 24-31    |
| APC-R700 Mouse Anti-Human CD196 (CCR6)                            | BD Biosciences | Cat # 565173 | Clone # 11A9     |

|                                     |                |                  |                   |
|-------------------------------------|----------------|------------------|-------------------|
| BB515 Rat Anti-Human CXCR5 (CD185)  | BD Biosciences | Cat # 564624     | Clone # RF8B2     |
| BV605 Mouse Anti-Human CD56         | BD Biosciences | Cat # 562780     | Clone # NCAM16.2  |
| PC-Cy7 Mouse Anti-Human CD25        | BD Biosciences | Cat # 335824     | Clone # 2A3       |
| BB700 Mouse Anti-Human CD16         | BD Biosciences | Cat # 746199     | Clone # 3G8       |
| BB700 Mouse Anti-Human CD4          | BD Biosciences | Cat # 566393     | Clone # SK3       |
| PE-Cy™5 Mouse Anti-Human CD183      | BD Biosciences | Cat # 551128     | Clone # 1C6/CXCR3 |
| PE-Cy™5 Mouse Anti-Human HLA-DR     | BD Biosciences | Cat # 562007     | Clone # G46-6     |
| FITC Mouse Anti-Human TNF- $\alpha$ | BD Biosciences | Cat # 554512     | Clone # MAb11     |
| GolgiStop (with Monensin)           | BD Biosciences | Cat # 554724     |                   |
| PerCP-eFluor 710 Anti-Human IL-2    | eBioscience    | Cat # 46-7029-42 | Clone # MQ1-17H12 |
| PerCP-eFluor 710 Anti-Human CD3     | eBioscience    | Cat # 46-0037-42 | Clone # OKT3      |
| PE Anti-Human TIGIT                 | eBioscience    | Cat # 12-9500-42 | Clone # MBSA43    |

#### **Key Chemicals, Peptides, and Commercial Assays**

| Reagents                                                    | Supplier        | Identifier        |  |
|-------------------------------------------------------------|-----------------|-------------------|--|
| PepTivator SARS-CoV-2 Prot_N                                | Miltenyi Biotec | Cat # 130-126-698 |  |
| PepTivator SARS-CoV-2 Prot_M                                | Miltenyi Biotec | Cat # 130-126-702 |  |
| PepTivator CMV pp65, human                                  | Miltenyi Biotec | Cat # 130-093-438 |  |
| ProMix™ HIV Peptide Pool                                    | Proimmune       | Cat # PX-HIV      |  |
| Human IFN- $\gamma$ ELISpot Kit                             | Mabtech         | Cat # P3420-2A    |  |
| Human Anti-Cytomegalovirus IgG ELISA Kit (CMV)              | Abcam           | Cat # ab108724    |  |
| Brefeldin A                                                 | eBioscience     | Cat # 00-4506-51  |  |
| Foxp3/TF Staining Buffer Set                                | Invitrogen      | Cat # 00-5523-00  |  |
| BD Cytofix/Cytoperm™ Fixation/Permeabilization Solution Kit | BD Biosciences  | Cat # 554714      |  |

**Fig. S1**

**a** Antigen binding screen pre-2020 samples

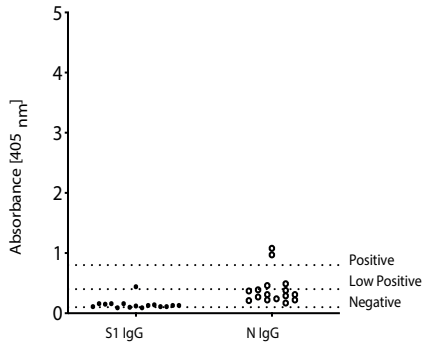

**b** Antigen binding screen 2020 samples

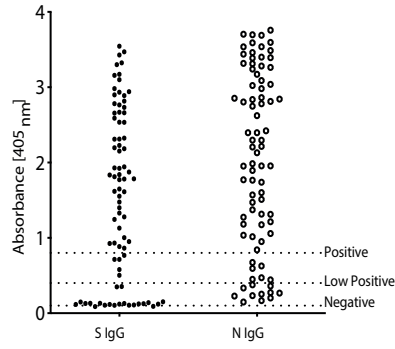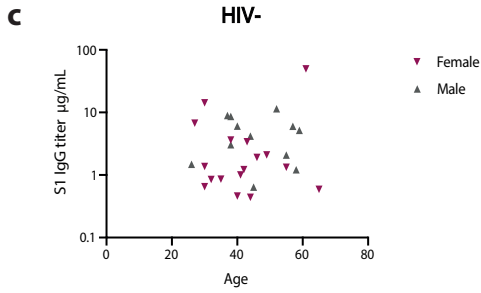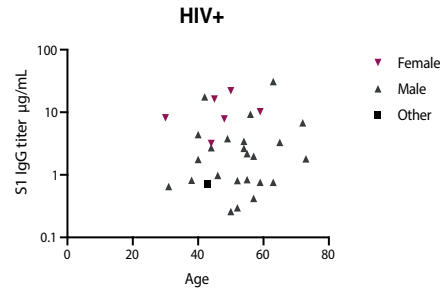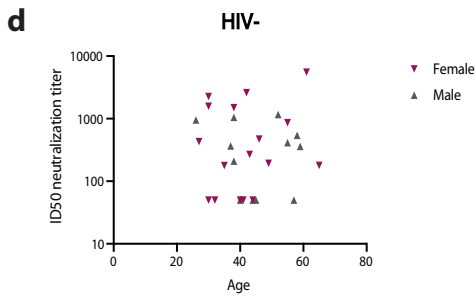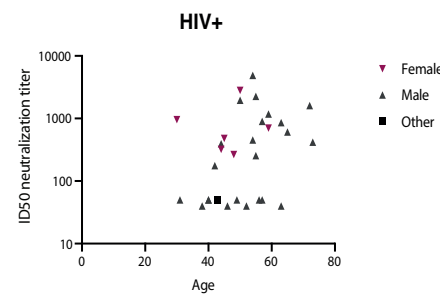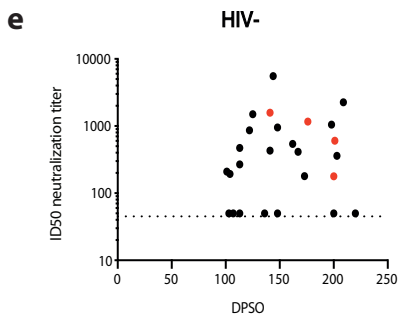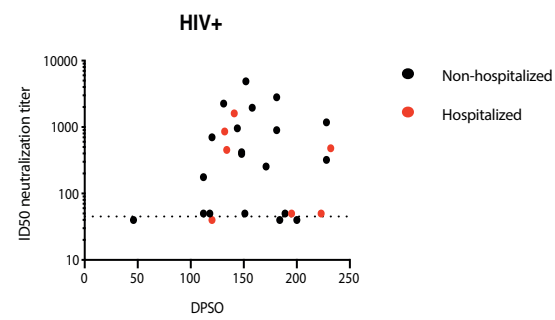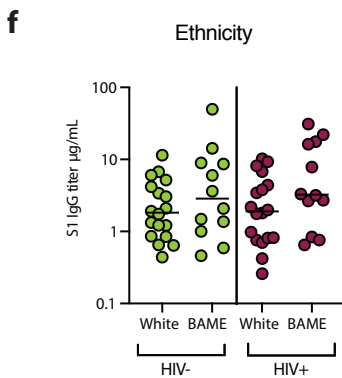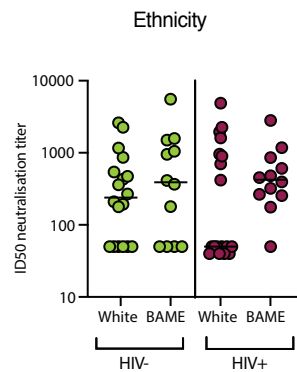

**Fig. S2**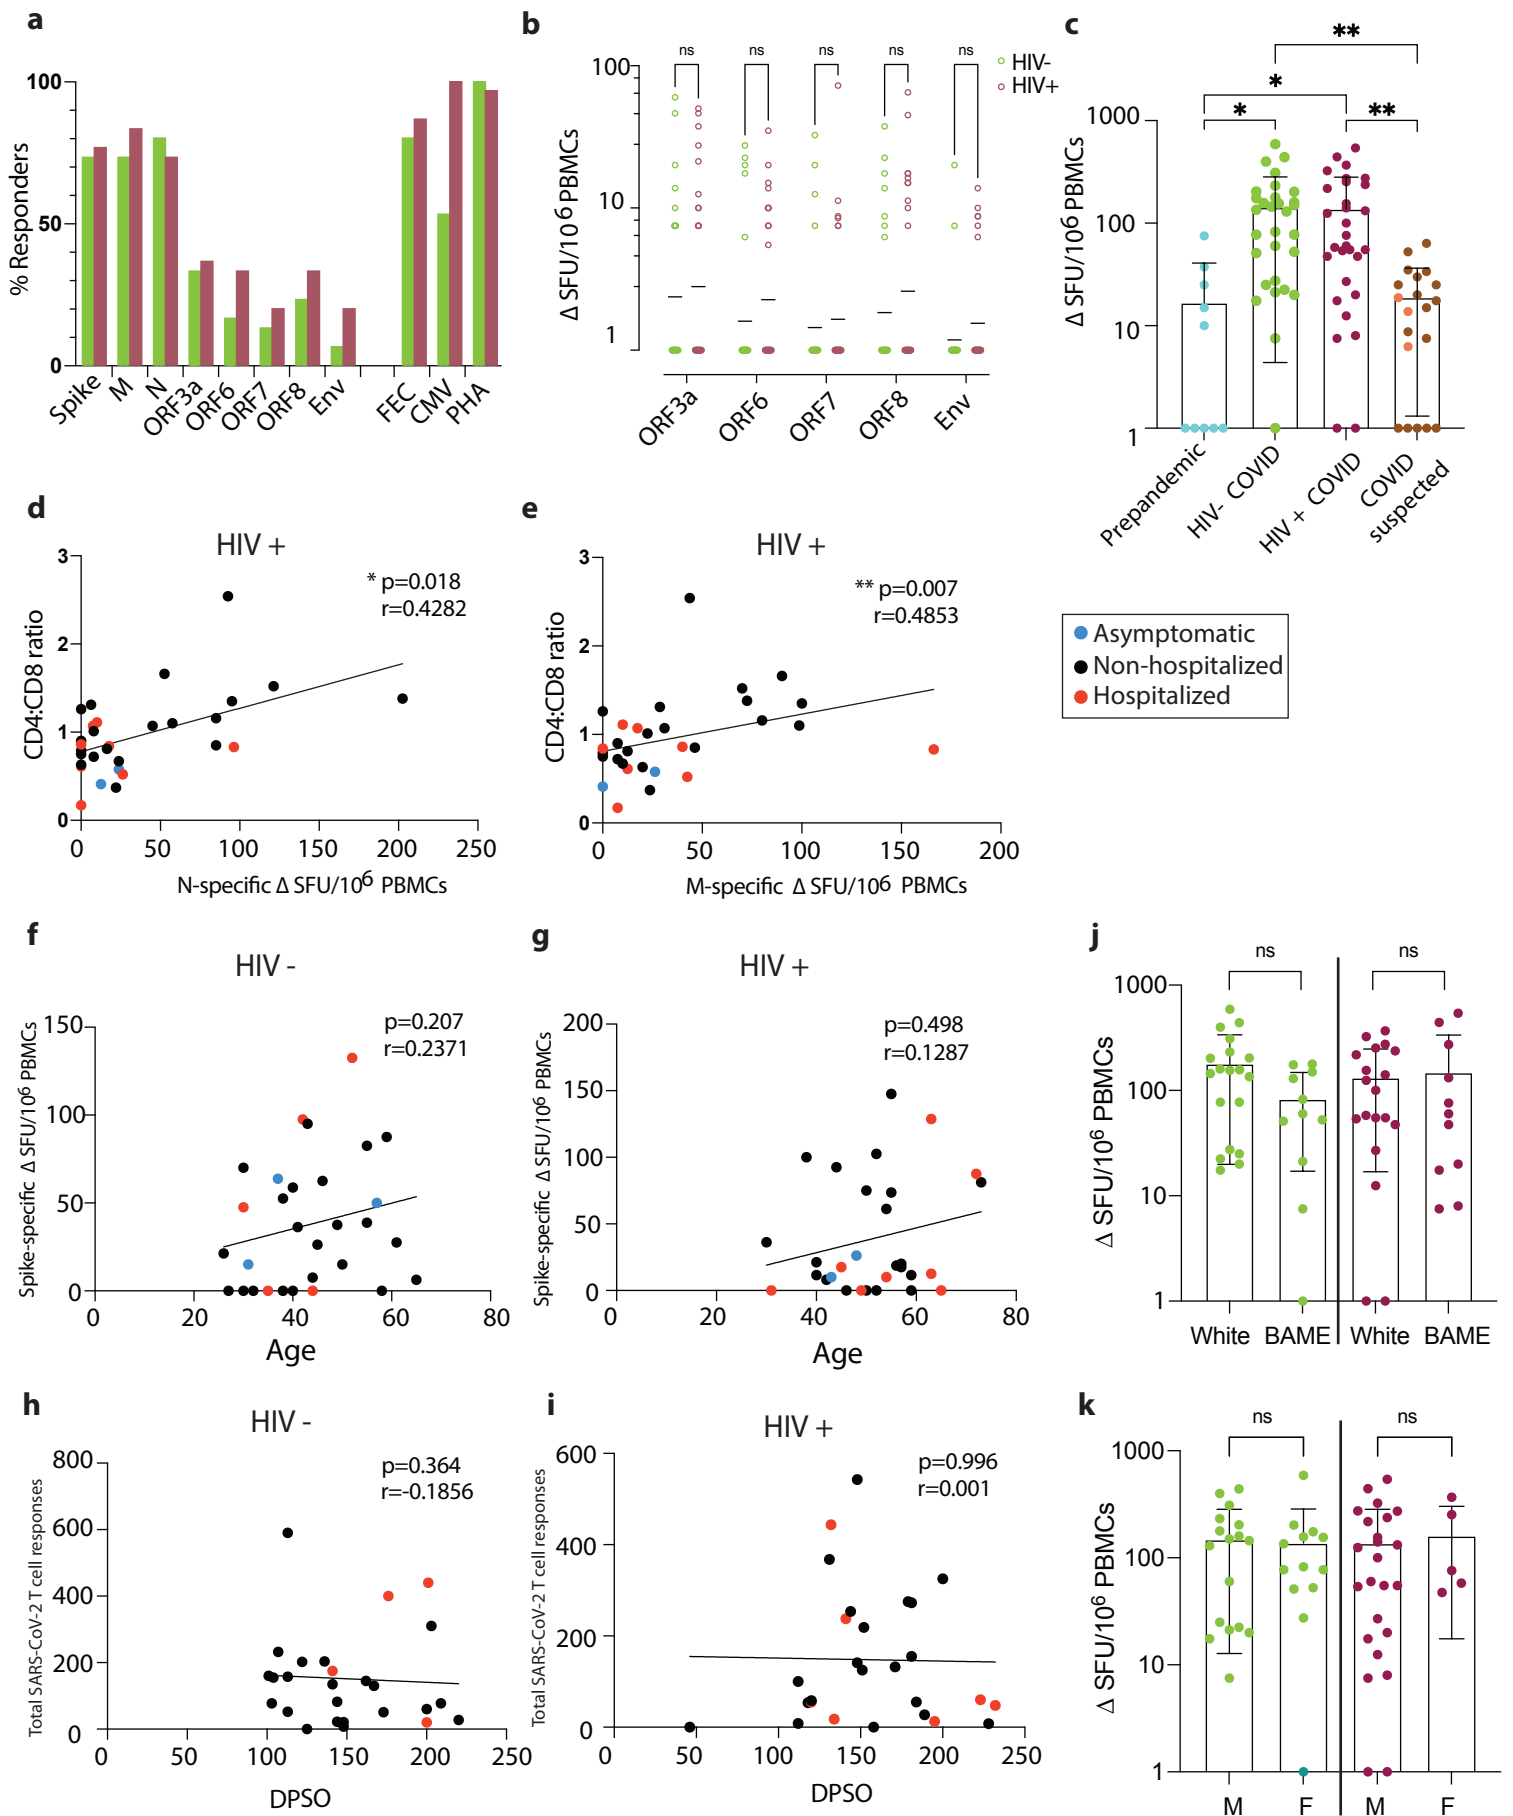

**Fig. S3****a** SARS-CoV-2-specific CD4 T cells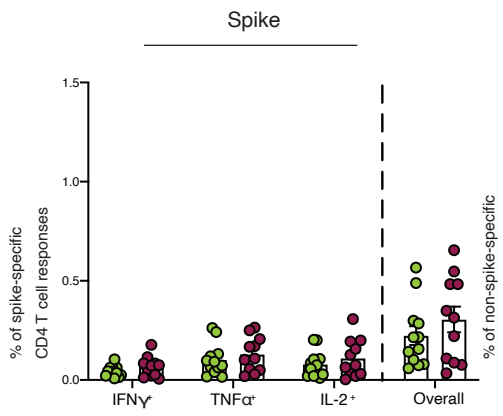**b**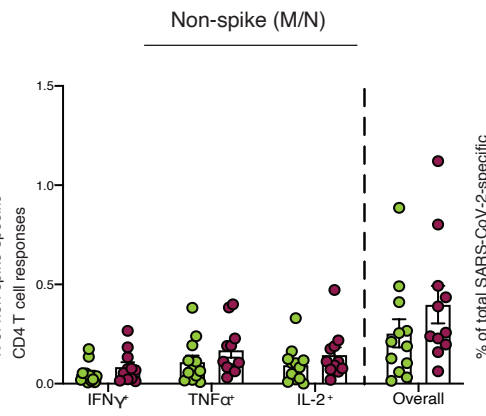**c**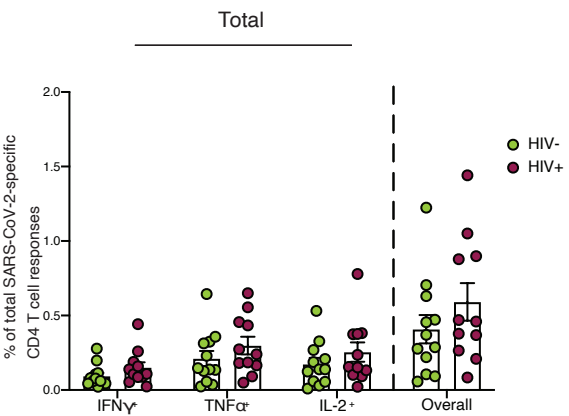**d** SARS-CoV-2-specific CD4 T cells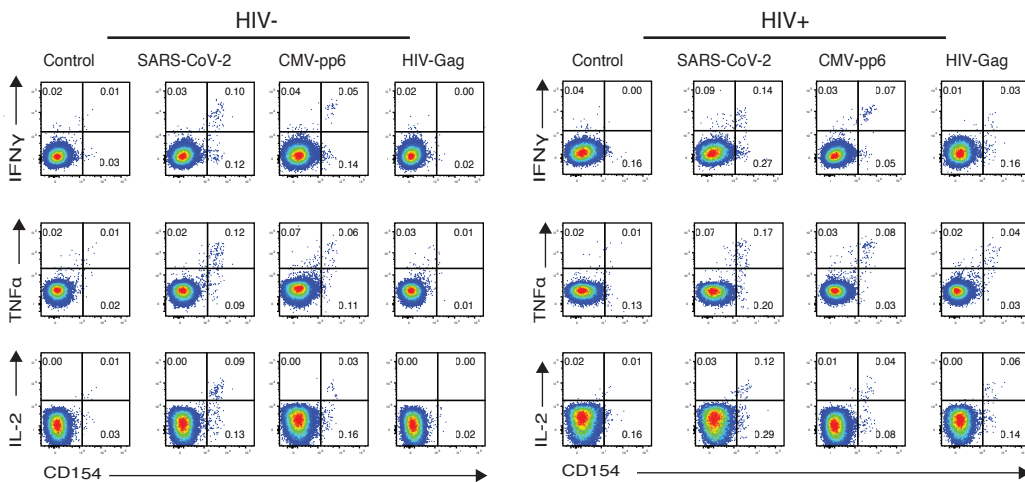**e**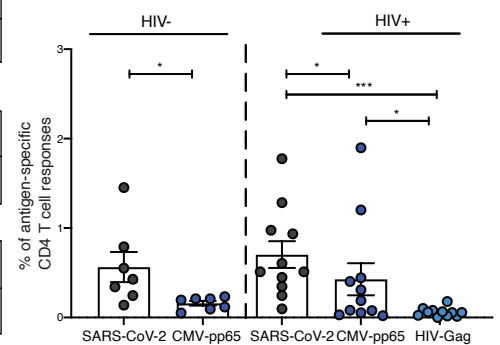**f** SARS-CoV-2 specific CD8 T cells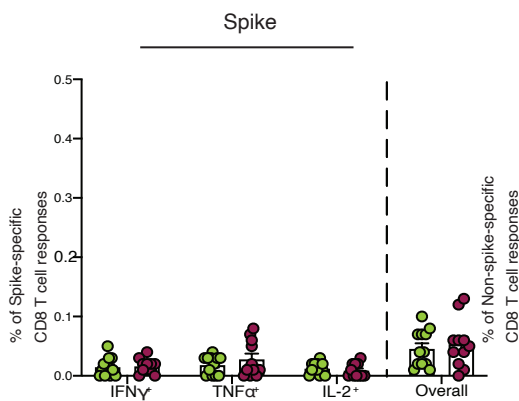**g**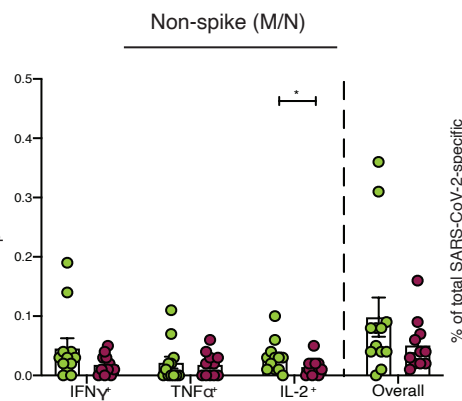**h**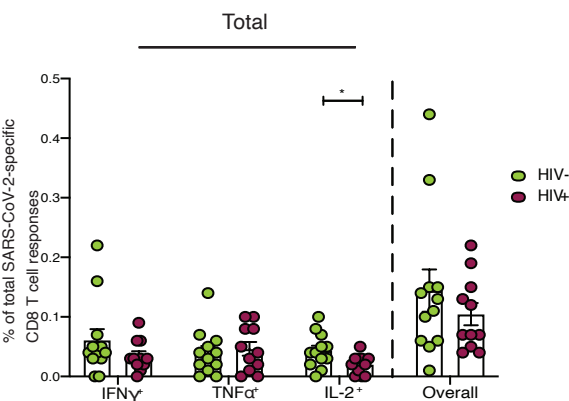**i** SARS-CoV-2-specific CD8 T cells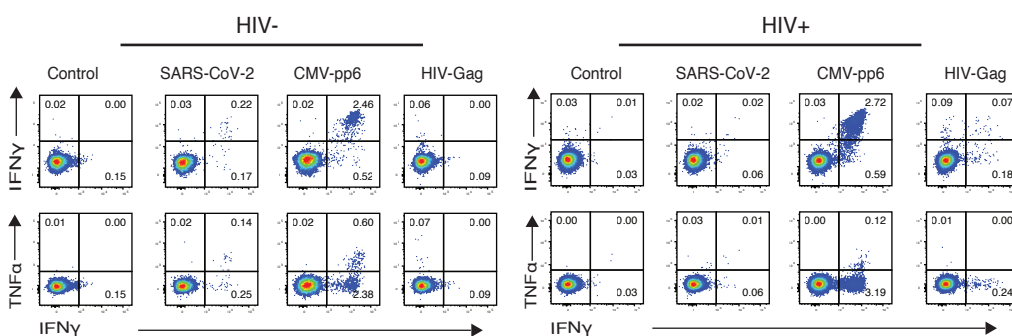**j**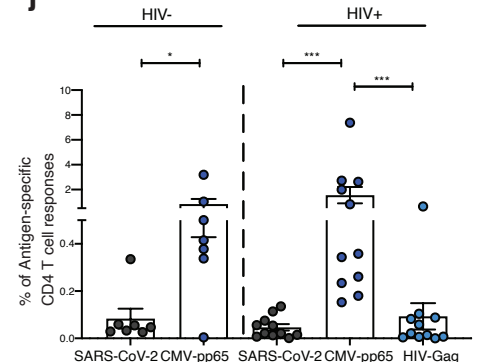

**Fig. S4**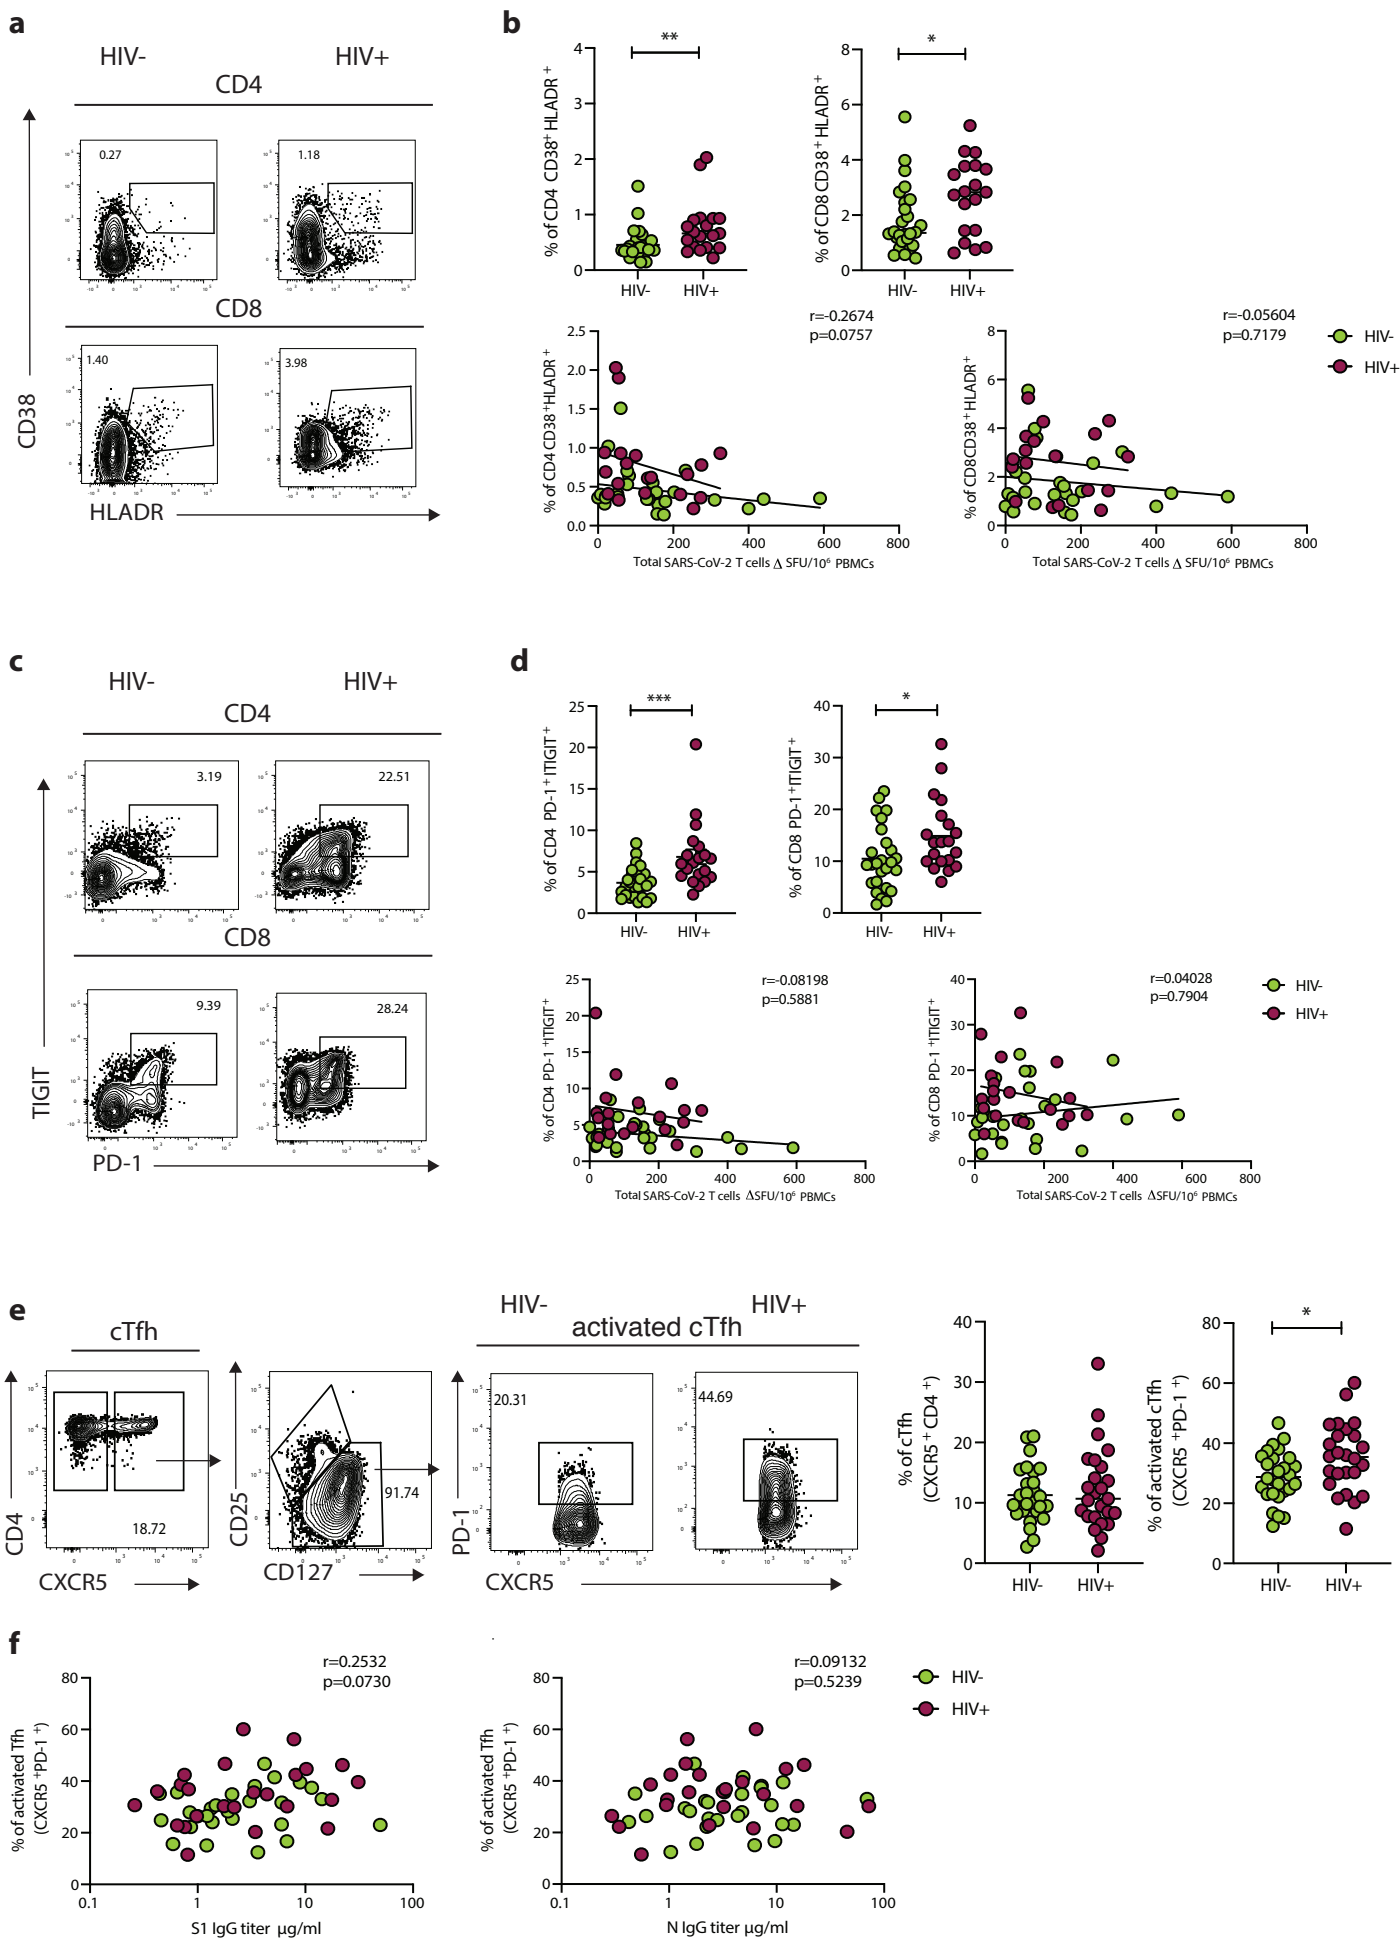

Supplement: ca3a6c0a37515749f4b44426.pdf [file ca3a6c0a37515749f4b44426.pdf]
